# Supplementary material for: The seroprevalence of SARS-CoV-2 during the first wave in Europe 2020: A systematic review
Source: PubMed Central journal article supplement (PMC8562786; doi:10.1371/journal.pone.0250541), 2021-11-02
Supplement: pone.0250541.s002.pdf [file pone.0250541.s002.pdf]

| Commercial Assay                                                                                           | Study                                                                               | Manufacturers Specificity                       | Manufacturers Sensitivity                     |
|------------------------------------------------------------------------------------------------------------|-------------------------------------------------------------------------------------|-------------------------------------------------|-----------------------------------------------|
| Chemiluminescent microparticle immunoassay Abbott Diagnostics ARCHITECT SARS-CoV-2 IgG                     | 117,64,67,124,122,106,41,25,50,134,86,120,59,104,112                                | 99.6% (99.0%; 99.9%)                            | 100 % (95.8%; 100%)                           |
| SARS-CoV-2 (IgA/IgG) ELISA EUROIMMUN Medizinische Labordiagnostik, Lübeck, Germany                         | 117,80,64,61,56,32,67,54,55,45,65,53,70,27,24,57,30,133,23,132,26,60,52,91,58,62,48 | 99.6% (IgG) 98,3 % (IgA)                        | 94.4 % (IgG) 96.9% (IgA)                      |
| Anti-SARS-CoV-2 NCP ELISA (IgG/IgM) EUROIMMUN Medizinische Labordiagnostik, Lübeck, Germany                | 45                                                                                  | 99.88% (IgG) 98.6 % (IgM)                       | 94.6% (IgG) 88.2 % (IgM)                      |
| Chemiluminescence immunoassay Diasorin LIAISON® SARS-CoV-2 S1/S2 IgG Assay)                                | 64,32,87,26,84,121,62,74                                                            | 99.3 (98.6%; 99.6%)                             | 97.6 (87.4%; 99.6%)                           |
| Maglumi 2019-nCoV IgG/IgM fully automated quantitative chemiluminescent immunoassay Snibe, Shenzhen, China | 28,85,78,98,71,127,95,88,62                                                         | 100% (IgG)                                      | 91.21% (IgG)                                  |
| Vircell COVID-19 ELISA (Vircell Spain S.L.U., Granada, Spain)                                              | 67,97,26,74,34                                                                      | 99% (IgM+IgA) 98% (IgG)                         | 88% (IgM+IgA). 85% (IgG)                      |
| Testsealabs® IgG/IgM Rapid Test Cassette, Hangzhou Testsea Biotechnology Co., Ltd                          | 107                                                                                 | 100% (IgG, IgM)                                 | 96% (IgG). 88% (IgM)                          |
| COVID-19 IgG/IgM rapid test cassette by Zhejiang Orient Gene Biotech Co., Ltd                              | 81,110,113,99,104                                                                   | 100% (95% CI: 93.4% - 100%)                     | 95.8% (95% CI: 89.6% - 98.8%)                 |
| Screen Test Covid-19 2019-nCoV IgG/IgM by Screen Italia S.r.l                                              | 81                                                                                  | IgG: 98.0% (89.4%-99.9%) IgM: 96% (86.3%-99.5%) | IgG: 100% (86.0%-100%) IgM: 85% (62.1%-96.8%) |
| Wantai SARS-CoV-2 Ab Rapid Test Lateral Flow Assay                                                         | 82                                                                                  | 98.8% (93.3%-99.8%)                             | 100% (88.7%-100%)                             |
| AFIAS COVID-19; Boditech, Gang-won-do, Korea                                                               | 83                                                                                  | 96.50%                                          | 87.50%                                        |

|                                                                                                                                                                                                         |                            |                                                                                                      |                                                                                       |
|---------------------------------------------------------------------------------------------------------------------------------------------------------------------------------------------------------|----------------------------|------------------------------------------------------------------------------------------------------|---------------------------------------------------------------------------------------|
| VITROS (Ortho Clinical Diagnostics, Rochester, NY, USA)                                                                                                                                                 | 97                         | 100% (99.1–100.0%)                                                                                   | 100.0% (92.7–100.0%) *positive percentage agreement reported                          |
| Virusee by Genobio Pharmaceutical, Shanghai, China                                                                                                                                                      | 93                         | 96.8% (IgG and IgM)                                                                                  | 96% (IgG) 94.6% (IgM)                                                                 |
| IgM/IgG Antibody to SARS-CoV-2 lateral flow test; Livzon Diagnostics Inc, Zhuhai, Guangdong, China)                                                                                                     | 36,35,39,101               | 99.20%                                                                                               | 90.60%                                                                                |
| POC test: Abbexa (Cambridge, UK) COVID-19 IgG/IgM Rapid Test Kit (abx294171) detecting antibodies against the SARS-CoV-2 nucleocapsid (N) and spike (S)-antigens.                                       | 135                        | 97.94%                                                                                               | 98.50%                                                                                |
| SARS-CoV-2 IgG multiplex particle-based flow cytometry (Luminex) assay developed at Cambridge University Hospital detecting antibodies against the SARS-CoV-2 N and full-length S-antigens <sup>1</sup> | 135                        | 100%                                                                                                 | 84%                                                                                   |
| Roche Elecsys AntiSARS-CoV-2 immunoassay (Roche Diagnostics, Rotkreuz, Switzerland)                                                                                                                     | 25,70,129,133,26,69,121,63 | 99.8% (99.7%; 99.9%)                                                                                 | 100% (88.3%; 100%)                                                                    |
| ELISA) IgG2 using a SARS-CoV-2 S spike and Nucleocapsid recombinant antigens (Diapro (Palex), Italy)                                                                                                    | 96                         |                                                                                                      | 98%                                                                                   |
| SARS-CoV-2 total Ab ELISA test Wantai Biological Pharmacy Enterprise                                                                                                                                    | 41,70,38,23,40,26,90       | 97.5% (91.3% - 99.3%)                                                                                | 96.7% (83.3% - 99.4%)                                                                 |
| COVID-19 IgM anti-N and IgG anti-N) ELISA Assay Kit (EDI/Eagle)                                                                                                                                         | 70                         | 100% (IgG) 100% (IgM)                                                                                | 100% (IgG) 45% (IgM)                                                                  |
| MP Rapid Test SARS-CoV-2 IgG/IgM (AMP Diagnostics, AMEDA Laboradiagnostik GmbH, Graz, Austria)                                                                                                          | 33                         | 97.3% (IgM) 96.4% (IgG)                                                                              | 95.7% (IgM) 91.8% (IgG)                                                               |
| Commercial chemiluminescence immunoassay (CLIA), (Medical Systems, 2019-nCoV IgM/IgG, Genova, Italy)                                                                                                    | 77                         | For IgG at a specificity of 99.1%.<br>For IgM specificity of 98.99%<br><b>According to the study</b> | For IgG sensitivity was 50%. For IgM sensitivity was 0%.<br><b>According to study</b> |

|                                                                                                                  |           |                                                       |                                                        |
|------------------------------------------------------------------------------------------------------------------|-----------|-------------------------------------------------------|--------------------------------------------------------|
| The anti-SARS-CoV-2 (IgG/IgM) POC-test (lateral flow) WONDFO                                                     | 39        | 98.7% (97.4-99.4)                                     | 94.7% (95% CI: 89.8-97.7)                              |
| All Test®2019-nCoV IgG/IgM RapidTest Cassette of Hangzhou All Test Biotech Co Ltd                                | 105       | 98% (IgG) 96%(IgM)                                    | 99.9% (IgG) 85%(IgM)                                   |
| Lysine Lateral Flow Test                                                                                         | 101       |                                                       | 98.6% <b>According to the study</b>                    |
| Sure Screen Lateral Flow Test                                                                                    | 101       | 99.67%                                                | 96.55%                                                 |
| VivaDiag COVID-19 immunoglobulin (Ig) G/IgM rapid lateral flow qualitative immunoassay, VivaChek Biotech, China) | 75        | 100%                                                  | 42%                                                    |
| CTK Biotech COVID-19 split IgG/IgM Rapid Test (CTK Biotech, Poway, CA, USA)                                      | 120       | 97.80%                                                | 97.10%                                                 |
| Encode SARS-CoV-2 split IgM/IgG One Step Rapid Test Device (Zhuhai Encode Medical Engineering, Zhuhai, China)    | 120       | 99.0% [95% CI:94.6–100] <b>According to the study</b> | 93.4% [95% CI 87.8–96.9] <b>According to the study</b> |
| EDI Novel Coronavirus COVID-19 IgG ELISA kit (Epitope Diagnostics, San Diego, CA, USA)                           | 120,62,26 | 99.8 (99.1%; 99.97%)                                  | 98.4 (95.4%; 99.5%)                                    |
| IgG/IgM Rapid Cassette (Acro Biotech, Inc., Rancho Cucamonga, CA, USA)                                           | 73        | IgG: 98.0% ( 89.4%-99.9%) IgM: 96% (86.3%-99.5%)      | IgG:100% (96-100%) IgM:85% (62.1- 96.8%)               |
| Beckman Coulter Access SARS-CoV-2 IgG assay                                                                      | 51        | 99.8%                                                 | 100%                                                   |
| POC GenBody COVID-19 IgM/IgG                                                                                     | 68        | 98.8% (93.3% -99.8%)                                  | 60% (42.3% -75.4%)                                     |
| SARS-CoV-2 nucleocapsid protein (NP) ELISA, IgG class antibodies (ImmunoDiagnostics, Hongkong)                   | 26        | 93.33%                                                | 92.50%                                                 |
| SARS-CoV-2 nucleocapsid protein (NP) ELISA, IgM class antibodies (ImmunoDiagnostics, Hongkong)                   | 26        |                                                       |                                                        |
| EDI Novel Coronavirus COVID-19 IgM ELISA kit (Epitope Diagnostics Inc., San Diego, CA)                           | 26        | 100%                                                  |                                                        |

|                                                                                                   |     |                                   |                                     |
|---------------------------------------------------------------------------------------------------|-----|-----------------------------------|-------------------------------------|
| ID Screen® SARS-CoV-2-N IgG Indirect ELISA (IDvet, Grabels, France; nucleocapsid protein antigen) | 26  | 99.9% (99.6-100%)                 | 93.3% (78.8-98.2%)                  |
| Point-of-care Ab diagnostic test, Toda Coronadiag® (TODA Pharma, Strasbourg France)               | 42  |                                   |                                     |
| PCL COVID-19 immunoglobulin (Ig) G/IgM Rapid Gold test (PCL Inc., Seoul, Republic of Korea)       | 103 | 100% (94.8%; 100%)                | 96.7% (83.3%; 99.4%)                |
| Point-of-care lateral flow immunoassay (BioMedomics IgM-IgG Combined Antibody Rapid Test)         | 79  | 90.63%                            | 88.66%                              |
| COVID-19 IgG/IgM Rapid Test Cassette; Multi-G                                                     | 29  | <b>97% According to the study</b> | <b>92.2% According to the study</b> |
| Lateral Flow Healgen Scientific                                                                   | 126 | 97.50%                            | 100%                                |
| Luminex based assay of Corona Immunitas                                                           | 116 | 99.60%                            | 93.30%                              |
| COVID-19 IgG/IgM Rapid Test, Prima Lab, Balerna, CH                                               | 72  | 98% (IgG) 96%(IgM)                | 100% (IgG) 85% (IgM)                |
| Lateral Flow Assay Fortress Diagnostics                                                           | 137 | 98.6% [95% CI: 97.1% to 99.4%]    | 84.4% [95% CI: 70.5% to 93.5%]      |
| YHLO's iFlash 1800                                                                                | 37  | 99.30%                            | 94%                                 |
| REAL COVID19 Rapid test cassette; Durviz, Valencia, Spain; reference RPPCOV1925                   | 105 | 89.4% – 99.9%                     | 86% – 100%                          |
